# Supplementary material
Source: HighWire-hosted journal article supplement (https://bmjopen.bmj.com/content/7/2/e014120)
Supplement: inline-supplementary-material-2 [file inline-supplementary-material-2.pdf]

1 **Additional file 2: GP Focus Group Interview Schedule**

2 **Introductions:**

3 Name, how long in clinical practice, time in your job, brief description of practice  
4 setting.

5 **A priori knowledge/experience of missed appointments**

6 Are missed appointments important? If so why? If not why not?

7 Can a distinction be made between patients who occasionally miss and those who  
8 serially miss GP appointments? If so what are those distinctions? Are they  
9 important?

10 How do you make that distinction in clinical practice? (probe distinctions between  
11 individuals and practice settings)

12 What does it mean for you, your practice and patients? Specifically patients who  
13 serially miss?

14 **Present proof of concept provisional data ( data cut offs, patient profiles)**

15 What does this data tell us about the issue of serial missed appointments?

16 What are the obvious things it tells us? What are the surprises? Why?

17 Do you think it misses important aspects of what you think about the issue? Why  
18 might that be?

19 If we present these options about what a definition of a patient who serially  
20 missed appointments compared to one who occasionally does, which one do you  
21 think is most accurate? Why?

22 Is there more information that we should look for before deciding we have a  
23 definition? What should that be?

24 **Conclusion**

25 Finally, are there aspects of missed appointments and the definition development  
26 we have worked on today that we have not yet covered and you would like to tell  
27 us about?
